# Supplementary material
Source: Research Square preprint supplement (doi:10.21203/rs.3.rs-8863172/v1)
Supplement: Supplementary file 1 [file c534a51bef7d2f2043edb7ec.docx]

**Supplementary Materials 1**. Regional Gray Matter Volume: AS Group vs. non-AS Group

| Volume (cm³) | AS group | non-AS group | F | *p* value | Corrected *p-value* |
| --- | --- | --- | --- | --- | --- |
| Accessory Basal Nucleus | 0.676 ± 0.186 | 0.609 ± 0.176 | 1.117 | **< 0.001** | 0.005 |
| Cortico Amygdaloid Transition | 0.688 ± 0.207 | 0.607 ± 0.178 | 1.361 | **0.005** | 0.026 |
| Paralaminar nucleus | 1.337 ± 0.218 | 1.390 ± 0.313 | 0.202 | 0.654 | 0.949 |
| Amygdala (L) | 1.344 ± 0.276 | 1.384 ± 0.269 | 0.039 | 0.845 | 0.949 |
| Amygdala (R) | 1.264 ± 0.280 | 1.314 ± 0.313 | 0.283 | 0.595 | 0.949 |
| Caudate (L) | 1.301 ± 0.352 | 1.441 ± 0.347 | 4.440 | **0.037** | 0.220 |
| Caudate (R) | 0.688 ± 0.114 | 0.737 ± 0.136 | 4.001 | **0.047** | 0.283 |
| Hippocampus (L) | 0.730 ± 0.185 | 0.805 ± 0.150 | 6.920 | **0.009** | 0.056 |
| Hippocampus (R) | 1.844 ± 0.354 | 1.983 ± 0.356 | 4.319 | **0.039** | 0.235 |
| Pallidum (L) | 1.877 ± 0.455 | 2.043 ± 0.351 | 6.166 | **0.014** | 0.084 |
| Pallidum (R) | 2.298 ± 0.518 | 2.402 ± 0.563 | 0.185 | 0.668 | 0.949 |
| Putamen (L) | 2.265 ± 0.588 | 2.356 ± 0.503 | 0.140 | 0.709 | 0.949 |
| Putamen (R) | 0.519 ± 0.183 | 0.613 ± 0.224 | 5.664 | **0.018** | 0.111 |
| Thalamus (L) | 0.560 ± 0.193 | 0.606 ± 0.164 | 1.381 | 0.242 | 0.949 |
| Thalamus (R) | 0.516 ± 0.177 | 0.571 ± 0.178 | 2.030 | 0.156 | 0.949 |
| Cingulum Anterior (L) | 0.679 ± 0.225 | 0.633 ± 0.137 | 5.405 | **0.021** | 0.128 |
| Cingulum Anterior (R) | 0.706 ± 0.163 | 0.793 ± 0.247 | 4.817 | **0.030** | 0.178 |
| Cingulum Middle (L) | 0.771 ± 0.171 | 0.804 ± 0.255 | 0.008 | 0.927 | 0.949 |
| Cingulum Middle (R) | 1.849 ± 0.448 | 1.915 ± 0.570 | 0.032 | 0.857 | 0.949 |
| Cingulum Post (L) | 1.680 ± 0.452 | 1.797 ± 0.553 | 0.650 | 0.421 | 0.949 |
| Cingulum Post (R) | 2.952 ± 0.651 | 3.036 ± 0.877 | 0.131 | 0.718 | 0.949 |
| Insula (L) | 2.215 ± 0.655 | 2.488 ± 0.806 | 4.686 | **0.032** | 0.192 |
| Insula (R) | 2.298 ± 0.523 | 2.362 ± 0.767 | 0.237 | 0.627 | 0.949 |
| Temporal Superior (L) | 2.756 ± 0.850 | 2.757 ± 0.838 | 0.891 | 0.347 | 0.949 |
| Temporal Superior (R) | 0.651 ± 0.248 | 0.698 ± 0.194 | 0.824 | 0.365 | 0.949 |
| Temporal Middle (L) | 0.530 ± 0.174 | 0.531 ± 0.126 | 0.050 | 0.823 | 0.949 |
| Temporal Middle (R) | 3.122 ± 0.750 | 3.559 ± 1.091 | 5.046 | **0.026** | 0.157 |
| Entorhinal (L) | 3.421 ± 0.670 | 3.806 ± 1.042 | 5.800 | **0.017** | 0.103 |
| Entorhinal (R) | 0.313 ± 0.163 | 0.352 ± 0.180 | 0.737 | 0.392 | 0.949 |
| Precentral (L) | 0.361 ± 0.137 | 0.395 ± 0.128 | 1.642 | 0.202 | 0.949 |
| Precentral (R) | 2.425 ± 0.795 | 2.366 ± 0.957 | 1.587 | 0.210 | 0.949 |
| Parahippocampal (L) | 1.904 ± 0.561 | 1.927 ± 0.569 | 0.510 | 0.476 | 0.949 |
| Parahippocampal (R) | 0.564 ± 0.204 | 0.664 ± 0.254 | 5.116 | **0.025** | 0.150 |
| Fusiform (L) | 0.373 ± 0.189 | 0.451 ± 0.195 | 4.009 | **0.047** | 0.283 |
| Fusiform (R) | 2.353 ± 0.559 | 2.374 ± 0.843 | 1.045 | 0.308 | 0.949 |
| Temporal Pole (L) | 2.696 ± 0.735 | 2.691 ± 0.680 | 0.848 | 0.359 | 0.949 |
| Temporal Pole (R) | 0.839 ± 0.313 | 0.807 ± 0.327 | 1.139 | 0.288 | 0.949 |
| Temporal Inferior (L) | 0.642 ± 0.245 | 0.673 ± 0.232 | 0.068 | 0.795 | 0.949 |
| Temporal Inferior (R) | 0.536 ± 0.118 | 0.562 ± 0.139 | 0.401 | 0.528 | 0.949 |
| Temporal Superior Banks (L) | 0.500 ± 0.141 | 0.443 ± 0.131 | 1.157 | **0.005** | 0.028 |
| Temporal Superior Banks (R) | 4.978 ± 1.698 | 5.440 ± 1.631 | 1.548 | 0.215 | 0.949 |
| Transverse temporal (L) | 5.219 ± 1.745 | 5.148 ± 1.586 | 2.175 | 0.142 | 0.949 |
| Transverse temporal (R) | 3.780 ± 1.249 | 3.980 ± 1.271 | 0.054 | 0.816 | 0.949 |
| Frontal Superior (L) | 4.430 ± 1.436 | 4.396 ± 1.396 | 1.869 | 0.174 | 0.949 |
| Frontal Superior (R) | 1.515 ± 0.564 | 1.646 ± 0.577 | 0.686 | 0.409 | 0.949 |
| Frontal Middle Rostral (L) | 1.340 ± 0.554 | 1.368 ± 0.641 | 0.420 | 0.518 | 0.949 |
| Frontal Middle Rostral (R) | 0.387 ± 0.117 | 0.419 ± 0.129 | 1.093 | 0.297 | 0.949 |
| Frontal Middle Caudal (L) | 0.460 ± 0.157 | 0.485 ± 0.159 | 0.146 | 0.703 | 0.949 |
| Frontal Middle Caudal (R) | 1.618 ± 0.441 | 1.739 ± 0.541 | 0.998 | 0.319 | 0.949 |
| Frontal pole (L) | 1.433 ± 0.463 | 1.554 ± 0.579 | 0.557 | 0.457 | 0.949 |
| Frontal pole (R) | 1.387 ± 0.404 | 1.490 ± 0.475 | 0.570 | 0.451 | 0.319 |
| Orbitofrontal Lateral (L) | 1.355 ± 0.386 | 1.513 ± 0.439 | 3.795 | 0.053 | 0.949 |
| Orbitofrontal Lateral (R) | 1.016 ± 0.306 | 1.123 ± 0.478 | 1.071 | 0.302 | 0.949 |
| Orbitofrontal Medial (L) | 0.938 ± 0.342 | 1.002 ± 0.304 | 0.419 | 0.518 | 0.949 |
| Orbitofrontal Medial (R) | 0.636 ± 0.230 | 0.625 ± 0.273 | 1.791 | 0.183 | 0.949 |
| Pars opercularis (L) | 0.615 ± 0.216 | 0.653 ± 0.217 | 0.227 | 0.635 | 0.949 |
| Pars opercularis (R) | 0.982 ± 0.322 | 1.105 ± 0.386 | 2.354 | 0.127 | 0.949 |
| Pars orbitalis (L) | 1.214 ± 0.330 | 1.318 ± 0.449 | 1.017 | 0.315 | 0.072 |
| Pars orbitalis (R) | 2.862 ± 0.759 | 3.268 ± 0.892 | 6.471 | **0.012** | 0.949 |
| Pars triangularis (L) | 3.480 ± 0.731 | 3.643 ± 0.855 | 0.238 | 0.627 | 0.949 |
| Pars triangularis (R) | 1.187 ± 0.300 | 1.272 ± 0.295 | 1.534 | 0.217 | 0.949 |
| Postcentral (L) | 1.252 ± 0.268 | 1.298 ± 0.321 | 0.052 | 0.820 | 0.192 |
| Postcentral (R) | 4.111 ± 0.928 | 4.660 ± 1.568 | 4.700 | **0.032** | 0.205 |
| aracentral (L) | 3.979 ± 1.076 | 4.488 ± 1.471 | 4.570 | **0.034** | 0.949 |
| Paracentral (R) | 3.107 ± 0.786 | 3.360 ± 1.105 | 0.927 | 0.337 | 0.949 |
| Parietal Superior (L) | 3.894 ± 1.100 | 4.040 ± 1.260 | 0.031 | 0.859 | 0.949 |
| Parietal Superior (R) | 1.772 ± 0.731 | 1.648 ± 0.391 | 2.852 | 0.093 | 0.949 |
| Parietal Inferior (L) | 1.383 ± 0.423 | 1.472 ± 0.440 | 0.565 | 0.454 | 0.949 |
| Parietal Inferior (R) | 3.040 ± 0.603 | 3.121 ± 0.940 | 0.268 | 0.606 | 0.949 |
| Cuneus (L) | 3.365 ± 0.728 | 3.515 ± 0.940 | 0.084 | 0.773 | 0.949 |
| Cuneus (R) | 3.283 ± 0.799 | 3.471 ± 1.146 | 0.101 | 0.752 | 0.949 |
| Precuneus (L) | 2.727 ± 0.628 | 2.852 ± 0.851 | 0.020 | 0.888 | 0.212 |
| Precuneus (R) | 3.169 ± 0.826 | 3.002 ± 0.643 | 4.822 | **0.029** | 0.949 |
| Superiorramarginal (L) | 3.379 ± 0.826 | 3.567 ± 0.780 | 0.797 | 0.374 | 0.949 |
| Superiorramarginal (R) | 1.155 ± 0.642 | 1.089 ± 0.399 | 1.275 | 0.261 | 0.949 |
| Lingual (L) | 1.236 ± 0.393 | 1.243 ± 0.425 | 0.022 | 0.881 | 0.949 |
| Lingual (R) | 4.330 ± 1.392 | 4.407 ± 1.261 | 0.250 | 0.618 | 0.949 |
| Peri calcarine (L) | 5.528 ± 1.185 | 5.513 ± 1.253 | 0.647 | 0.423 | 0.267 |
| Peri calcarine (R) | 0.772 ± 0.193 | 0.850 ± 0.213 | 4.109 | **0.044** | 0.289 |
| OCorpus Callosumipital Lateral (L) | 0.692 ± 0.195 | 0.771 ± 0.213 | 3.588 | 0.060 | 0.949 |
| OCorpus Callosumipital Lateral (R) | 0.172 ± 0.059 | 0.162 ± 0.049 | 1.635 | 0.203 | 0.949 |
| Isthmus of cinguLaterale (L) | 0.185 ± 0.069 | 0.184 ± 0.051 | 0.254 | 0.615 | 0.949 |
| Isthmus of cinguLaterale (R) | 0.161 ± 0.102 | 0.197 ± 0.181 | 0.646 | 0.423 | 0.949 |
| ACorpus Callosumumbens Area (L) | 0.122 ± 0.123 | 0.145 ± 0.193 | 0.057 | 0.812 | 0.949 |
| ACorpus Callosumumbens Area (R) | 2.026 ± 0.622 | 2.249 ± 0.592 | 6.765 | **0.010** | 0.949 |
| VentralDC (L) | 2.439 ± 0.594 | 2.553 ± 0.319 | 1.627 | 0.204 | 0.122 |
| VentralDC (R) | 1.226 ± 0.345 | 1.295 ± 0.250 | 0.943 | 0.333 | 0.949 |
| Pons | 0.018 ± 0.024 | 0.018 ± 0.027 | 0.001 | 0.971 | 0.949 |
| Middlebrain | 0.055 ± 0.029 | 0.067 ± 0.038 | 2.775 | 0.098 | 0.949 |
| Medialulla | 0.389 ± 0.059 | 0.405 ± 0.099 | 0.272 | 0.603 | 0.949 |
| Superior Cerebellar Peduncle | 0.267 ± 0.105 | 0.274 ± 0.115 | 0.012 | 0.913 | 0.949 |
| Optic Chiasm | 0.278 ± 0.111 | 0.294 ± 0.126 | 0.259 | 0.611 | 0.949 |
| Corpus Callosum Anteriorerior | 0.129 ± 0.036 | 0.143 ± 0.054 | 1.596 | 0.208 | 0.949 |
| Corpus Callosum Middle Anteriorerior | 0.224 ± 0.064 | 0.249 ± 0.081 | 2.696 | 0.103 | 0.949 |

Note: Data are shown as mean ± SD. Abbreviations: AS = Asphyxia, L = left, R = right, SD = Standard Deviation.

**Supplementary Materials 2.** Regional Cortical Thickness: AS Group vs. non-AS Group

| Thickness (cm) | AS group | non-AS group | F | *p* value | Corrected *p-value* |
| --- | --- | --- | --- | --- | --- |
| Precentral (L) | 1.854 ± 0.153 | 1.884 ± 0.133 | 0.772 | 0.381 | 0.780 |
| Precentral (R) | 1.886 ± 0.143 | 1.903 ± 0.149 | 0.022 | 0.882 | 0.982 |
| Postcentral (L) | 1.867 ± 0.117 | 1.919 ± 0.134 | 4.786 | **0.030** | 0.301 |
| Postcentral (R) | 1.878 ± 0.162 | 1.887 ± 0.144 | 0.001 | 0.982 | 0.982 |
| Paracentral (L) | 1.924 ± 0.192 | 1.938 ± 0.140 | 0.008 | 0.930 | 0.982 |
| Paracentral (R) | 1.945 ± 0.184 | 1.967 ± 0.135 | 0.211 | 0.647 | 0.782 |
| Frontal Superior (L) | 1.822 ± 0.171 | 1.840 ± 0.205 | 0.004 | 0.948 | 0.982 |
| Frontal Superior (R) | 1.838 ± 0.187 | 1.860 ± 0.212 | 0.001 | 0.980 | 0.982 |
| Frontal Middle Rostral (L) | 1.782 ± 0.163 | 1.788 ± 0.176 | 0.366 | 0.546 | 0.782 |
| Frontal Middle Rostral (R) | 1.770 ± 0.164 | 1.799 ± 0.195 | 0.163 | 0.687 | 0.782 |
| Frontal Middle Caudal (L) | 1.705 ± 0.320 | 1.795 ± 0.183 | 4.444 | **0.037** | 0.366 |
| Frontal Middle Caudal (R) | 1.745 ± 0.156 | 1.738 ± 0.194 | 0.705 | 0.402 | 0.729 |
| Frontalpole (L) | 1.591 ± 0.362 | 1.632 ± 0.352 | 0.024 | 0.876 | 0.982 |
| Frontalpole (R) | 1.607 ± 0.356 | 1.668 ± 0.323 | 0.461 | 0.498 | 0.782 |
| Orbitofrontal Lateral (L) | 1.772 ± 0.195 | 1.775 ± 0.258 | 0.472 | 0.493 | 0.782 |
| Orbitofrontal Lateral (R) | 1.697 ± 0.190 | 1.737 ± 0.215 | 0.521 | 0.471 | 0.782 |
| Orbitofrontal Medial (L) | 1.554 ± 0.164 | 1.594 ± 0.239 | 0.360 | 0.550 | 0.782 |
| Orbitofrontal Medial (R) | 1.678 ± 0.162 | 1.685 ± 0.226 | 0.194 | 0.661 | 0.782 |
| Parsopercularis (L) | 1.841 ± 0.183 | 1.846 ± 0.171 | 0.215 | 0.644 | 0.782 |
| Parsopercularis (R) | 1.796 ± 0.198 | 1.835 ± 0.175 | 0.903 | 0.343 | 0.729 |
| Parsorbitalis (L) | 1.795 ± 0.188 | 1.800 ± 0.254 | 0.321 | 0.572 | 0.782 |
| Parsorbitalis (R) | 1.667 ± 0.462 | 1.796 ± 0.242 | 5.549 | **0.020** | 0.197 |
| Parstriangularis (L) | 1.802 ± 0.121 | 1.816 ± 0.168 | 0.027 | 0.869 | 0.982 |
| Parstriangularis (R) | 1.817 ± 0.196 | 1.862 ± 0.167 | 1.553 | 0.214 | 0.595 |
| Insula (L) | 1.850 ± 0.261 | 1.878 ± 0.256 | 0.027 | 0.869 | 0.982 |
| Insula (R) | 1.733 ± 0.377 | 1.797 ± 0.230 | 1.115 | 0.293 | 0.595 |
| Cingulum Anterior (L) | 1.621 ± 0.323 | 1.689 ± 0.168 | 2.407 | 0.123 | 0.509 |
| Cingulum Anterior (R) | 1.801 ± 0.224 | 1.799 ± 0.200 | 0.518 | 0.473 | 0.782 |
| Cingulum Middle (L) | 1.516 ± 0.408 | 1.647 ± 0.236 | 5.849 | **0.017** | 0.167 |
| Cingulum Middle (R) | 1.740 ± 0.144 | 1.760 ± 0.168 | 0.079 | 0.779 | 0.782 |
| Cingulum Post (L) | 1.658 ± 0.152 | 1.669 ± 0.154 | 0.001 | 0.973 | 0.982 |
| Cingulum Post (R) | 1.740 ± 0.146 | 1.766 ± 0.169 | 0.246 | 0.621 | 0.782 |
| IsthmuscinguLaterale (L) | 1.319 ± 0.102 | 1.320 ± 0.177 | 0.170 | 0.680 | 0.782 |
| IsthmuscinguLaterale (R) | 1.353 ± 0.152 | 1.373 ± 0.186 | 0.131 | 0.717 | 0.782 |
| Parahippocampal (L) | 1.602 ± 0.210 | 1.630 ± 0.255 | 0.147 | 0.702 | 0.782 |
| Parahippocampal (R) | 1.566 ± 0.204 | 1.555 ± 0.209 | 0.010 | 0.920 | 0.982 |
| Parietal Superior (L) | 1.743 ± 0.113 | 1.764 ± 0.141 | 0.240 | 0.625 | 0.782 |
| Parietal Superior (R) | 1.769 ± 0.132 | 1.787 ± 0.135 | 0.136 | 0.713 | 0.782 |
| Parietal Inferio (L) | 1.825 ± 0.144 | 1.843 ± 0.150 | 0.039 | 0.844 | 0.912 |
| Parietal Inferio (R) | 1.811 ± 0.124 | 1.834 ± 0.131 | 0.430 | 0.513 | 0.782 |
| Cuneus (L) | 1.784 ± 0.144 | 1.785 ± 0.133 | 0.082 | 0.776 | 0.782 |
| Cuneus (R) | 1.824 ± 0.151 | 1.846 ± 0.138 | 0.361 | 0.549 | 0.782 |
| Entorhinal (L) | 1.751 ± 0.365 | 1.810 ± 0.200 | 1.209 | 0.273 | 0.595 |
| Entorhinal (R) | 1.918 ± 0.216 | 1.924 ± 0.228 | 0.101 | 0.751 | 0.782 |
| Fusiform (L) | 1.820 ± 0.138 | 1.831 ± 0.170 | 0.017 | 0.896 | 0.982 |
| Fusiform (R) | 1.850 ± 0.165 | 1.891 ± 0.143 | 1.859 | 0.175 | 0.595 |
| Lingual (L) | 1.641 ± 0.184 | 1.629 ± 0.178 | 0.707 | 0.402 | 0.729 |
| Lingual (R) | 1.636 ± 0.198 | 1.681 ± 0.175 | 1.509 | 0.221 | 0.595 |
| Pericalcarine (L) | 1.837 ± 0.247 | 1.859 ± 0.173 | 0.238 | 0.626 | 0.782 |
| Pericalcarine (R) | 1.866 ± 0.193 | 1.878 ± 0.174 | 0.080 | 0.777 | 0.782 |
| Precuneus (L) | 1.809 ± 0.117 | 1.817 ± 0.153 | 0.056 | 0.814 | 0.912 |
| Precuneus (R) | 1.849 ± 0.121 | 1.862 ± 0.122 | 0.025 | 0.875 | 0.982 |
| Superiorramarginal (L) | 1.862 ± 0.129 | 1.879 ± 0.148 | 0.045 | 0.832 | 0.912 |
| Superiorramarginal (R) | 1.822 ± 0.118 | 1.843 ± 0.141 | 0.226 | 0.635 | 0.782 |
| Temporal Superior (L) | 1.804 ± 0.119 | 1.857 ± 0.148 | 4.121 | **0.044** | 0.440 |
| Temporal Superior (R) | 1.862 ± 0.141 | 1.874 ± 0.141 | 0.002 | 0.966 | 0.982 |
| Temporal Middle (L) | 1.820 ± 0.133 | 1.838 ± 0.183 | 0.012 | 0.911 | 0.982 |
| Temporal Middle (R) | 1.807 ± 0.175 | 1.826 ± 0.158 | 0.057 | 0.812 | 0.912 |
| Temporal Inferio (L) | 1.863 ± 0.153 | 1.872 ± 0.186 | 0.045 | 0.832 | 0.912 |
| Temporal Inferio (R) | 1.773 ± 0.232 | 1.807 ± 0.162 | 0.587 | 0.445 | 0.782 |
| Temporalpole (L) | 1.699 ± 0.247 | 1.685 ± 0.259 | 1.159 | 0.283 | 0.595 |
| Temporalpole (R) | 1.676 ± 0.369 | 1.736 ± 0.224 | 1.334 | 0.250 | 0.595 |
| Temporal Superior Banks (L) | 1.897 ± 0.153 | 1.913 ± 0.149 | 0.024 | 0.876 | 0.982 |
| Temporal Superior Banks (R) | 1.864 ± 0.136 | 1.929 ± 0.159 | 5.338 | **0.022** | 0.221 |
| Transverse temporal (L) | 2.013 ± 0.253 | 2.051 ± 0.223 | 1.288 | **0.001** | 0.013 |
| Transverse temporal (R) | 2.032 ± 0.446 | 2.178 ± 0.221 | 7.246 | **0.008** | 0.079 |
| OCorpus Callosumipital Lateral (L) | 1.801 ± 0.128 | 1.796 ± 0.163 | 0.659 | 0.418 | 0.729 |
| OCorpus Callosumipital Lateral (R) | 1.800 ± 0.151 | 1.827 ± 0.125 | 0.764 | 0.383 | 0.729 |

Note: Data are shown as mean ± SD. Abbreviations: AS = Asphyxia, L = left, R = right, SD = Standard Deviation.

**Supplementary Materials 3.** Regional Cortical Surface Area: AS Group vs. non-AS Group

| Surface Area (cm²) | AS group | non-AS group | F | *p* value | Corrected *p-value* |
| --- | --- | --- | --- | --- | --- |
| Precentral (L) | 1562.741 ± 390.158 | 1749.108 ± 441.59 | 4.026 | **0.047** | 0.374 |
| Precentral (R) | 1709.87 ± 313.363 | 1856.218 ± 425.582 | 2.701 | 0.102 | 0.460 |
| Postcentral (L) | 1366.149 ± 385.499 | 1456.232 ± 417.843 | 0.407 | 0.525 | 0.672 |
| Postcentral (R) | 1544.519 ± 368.033 | 1569.046 ± 387.792 | 0.169 | 0.682 | 0.754 |
| Paracentral (L) | 610.16 ± 164.31 | 645.223 ± 142.53 | 0.688 | 0.408 | 0.613 |
| Paracentral (R) | 619.707 ± 174.009 | 668.703 ± 132.904 | 2.105 | 0.149 | 0.507 |
| Frontal Superior (L) | 2601.47 ± 912.136 | 2856.498 ± 619.318 | 2.952 | 0.088 | 0.440 |
| Frontal Superior (R) | 2471.04 ± 445.087 | 2682.694 ± 521.938 | 4.966 | **0.027** | 0.327 |
| Frontal Middle Rostral (L) | 1886.758 ± 427.896 | 2017.048 ± 464.22 | 1.160 | 0.283 | 0.590 |
| Frontal Middle Rostral (R) | 2090.303 ± 435.888 | 2151.305 ± 464.195 | 0.000 | 0.992 | 0.993 |
| Frontal Middle Caudal (L) | 746.598 ± 283.972 | 818.729 ± 216.564 | 1.584 | 0.210 | 0.549 |
| Frontal Middle Caudal (R) | 600.75 ± 171.818 | 677.928 ± 234.336 | 2.323 | 0.130 | 0.489 |
| Frontalpole (L) | 220.124 ± 74.624 | 247.347 ± 43.965 | 5.854 | **0.017** | 0.295 |
| Frontalpole (R) | 285.452 ± 78.903 | 293.165 ± 47.008 | 0.209 | 0.648 | 0.737 |
| Orbitofrontal Lateral (L) | 874.118 ± 237.394 | 941.069 ± 196.592 | 2.316 | 0.130 | 0.489 |
| Orbitofrontal Lateral (R) | 813.531 ± 261.207 | 871.245 ± 228.218 | 0.736 | 0.392 | 0.605 |
| Orbitofrontal Medial (L) | 787.368 ± 204.375 | 839.263 ± 166.785 | 1.340 | 0.249 | 0.571 |
| Orbitofrontal Medial (R) | 768.188 ± 191.129 | 841.519 ± 147.56 | 5.580 | **0.019** | 0.302 |
| Parsopercularis (L) | 539.319 ± 169.389 | 588.562 ± 186.611 | 0.978 | 0.324 | 0.577 |
| Parsopercularis (R) | 483.897 ± 162.19 | 515.051 ± 131.531 | 0.557 | 0.457 | 0.637 |
| Parsorbitalis (L) | 360.317 ± 105.097 | 349.942 ± 98.63 | 1.855 | 0.175 | 0.525 |
| Parsorbitalis (R) | 322.524 ± 108.154 | 338.549 ± 83.962 | 0.307 | 0.580 | 0.699 |
| Parstriangularis (L) | 500.241 ± 148.816 | 559.171 ± 161.773 | 2.522 | 0.114 | 0.472 |
| Parstriangularis (R) | 595.205 ± 183.508 | 645.939 ± 173.393 | 1.206 | 0.274 | 0.585 |
| Insula (L) | 749.917 ± 186.933 | 831.901 ± 149.183 | 8.621 | **0.004** | 0.241 |
| Insula (R) | 778.442 ± 246.1 | 860.83 ± 164.809 | 5.105 | **0.025** | 0.320 |
| Cingulum Anterior (L) | 311.757 ± 109.889 | 336.102 ± 105.692 | 0.672 | 0.414 | 0.617 |
| Cingulum Anterior (R) | 294.314 ± 85.835 | 310.824 ± 79.692 | 0.460 | 0.499 | 0.655 |
| Cingulum Middle (L) | 281.421 ± 104.051 | 305.528 ± 68.865 | 1.781 | 0.184 | 0.531 |
| Cingulum Middle (R) | 319.415 ± 53.321 | 322.982 ± 58.054 | 0.017 | 0.896 | 0.844 |
| Cingulum Post (L) | 382.349 ± 110.514 | 425.268 ± 96.952 | 4.574 | **0.034** | 0.347 |
| Cingulum Post (R) | 380.627 ± 78.726 | 395.719 ± 91.862 | 0.024 | 0.876 | 0.835 |
| IsthmuscinguLaterale (L) | 441.772 ± 94.793 | 484.613 ± 109.476 | 3.239 | 0.074 | 0.423 |
| IsthmuscinguLaterale (R) | 428.635 ± 128.998 | 470.091 ± 129.531 | 1.795 | 0.182 | 0.529 |
| Parahippocampal (L) | 178.256 ± 81.15 | 202.964 ± 114.938 | 0.749 | 0.388 | 0.603 |
| Parahippocampal (R) | 227.119 ± 87.625 | 249.384 ± 78.871 | 1.584 | 0.210 | 0.549 |
| Parietal Superior (L) | 2086.304 ± 503.726 | 2426.437 ± 696.282 | 6.844 | **0.010** | 0.266 |
| Parietal Superior (R) | 2036.085 ± 570.571 | 2263.899 ± 613.635 | 3.208 | 0.075 | 0.425 |
| Parietal Inferio (L) | 1588.66 ± 391.881 | 1703.114 ± 463.743 | 0.845 | 0.360 | 0.589 |
| Parietal Inferio (R) | 2008.059 ± 451.703 | 2101.081 ± 553.179 | 0.061 | 0.806 | 0.803 |
| Cuneus (L) | 929.545 ± 319.159 | 885.387 ± 228.688 | 1.293 | 0.257 | 0.576 |
| Cuneus (R) | 662.71 ± 219.708 | 712.114 ± 218.581 | 0.779 | 0.379 | 0.601 |
| Entorhinal (L) | 292.194 ± 153.265 | 328.256 ± 112.597 | 1.741 | 0.189 | 0.535 |
| Entorhinal (R) | 233.678 ± 81.425 | 251.531 ± 70.844 | 1.570 | 0.212 | 0.550 |
| Fusiform (L) | 1737.812 ± 525.833 | 1687.709 ± 564.998 | 0.822 | 0.366 | 0.593 |
| Fusiform (R) | 1275.306 ± 287.381 | 1265.724 ± 322.272 | 0.842 | 0.360 | 0.589 |
| Lingual (L) | 1616.752 ± 357.558 | 1710.313 ± 394.332 | 1.092 | 0.298 | 0.597 |
| Lingual (R) | 1720.27 ± 396.328 | 1740.367 ± 370.089 | 0.003 | 0.959 | 0.877 |
| Pericalcarine (L) | 580.979 ± 221.358 | 596.393 ± 239.506 | 0.003 | 0.959 | 0.877 |
| Pericalcarine (R) | 561.348 ± 164.001 | 593.316 ± 193.79 | 0.417 | 0.520 | 0.670 |
| Precuneus (L) | 1632.994 ± 403.949 | 1689.66 ± 373.635 | 0.014 | 0.905 | 0.848 |
| Precuneus (R) | 1779.323 ± 373.759 | 1870.461 ± 389.136 | 0.624 | 0.431 | 0.625 |
| Superiorramarginal (L) | 1726.048 ± 413.903 | 1851.015 ± 502.447 | 0.808 | 0.370 | 0.595 |
| Superiorramarginal (R) | 1370.527 ± 299.559 | 1464.65 ± 343.81 | 1.185 | 0.278 | 0.587 |
| Temporal Superior (L) | 1299.54 ± 308.662 | 1377.641 ± 367.997 | 0.500 | 0.481 | 0.649 |
| Temporal Superior (R) | 1072.404 ± 419.946 | 1218.399 ± 356.873 | 3.348 | 0.069 | 0.416 |
| Temporal Middle (L) | 1122.531 ± 194.855 | 1153.354 ± 335.593 | 0.029 | 0.865 | 0.830 |
| Temporal Middle (R) | 1286.479 ± 328.109 | 1299.639 ± 343.932 | 0.169 | 0.682 | 0.754 |
| Temporal Inferio (L) | 1230.642 ± 274.679 | 1262.245 ± 408.825 | 0.062 | 0.804 | 0.802 |
| Temporal Inferio (R) | 1398.594 ± 282.284 | 1440.742 ± 306.248 | 0.075 | 0.785 | 0.793 |
| Temporalpole (L) | 361.58 ± 126.302 | 409.391 ± 113.549 | 3.413 | 0.067 | 0.413 |
| Temporalpole (R) | 248.021 ± 125.368 | 284.643 ± 108.392 | 2.189 | 0.141 | 0.500 |
| Temporal Superior_Banks (L) | 420.497 ± 159.247 | 412.646 ± 164.544 | 0.253 | 0.616 | 0.723 |
| Temporal Superior Banks (R) | 302.311 ± 135.081 | 333.109 ± 109.041 | 1.092 | 0.298 | 0.597 |
| Transversetemporal (L) | 178.554 ± 78.614 | 176.96 ± 69.8 | 0.192 | 0.662 | 0.743 |
| Transversetemporal (R) | 134.148 ± 63.867 | 148.738 ± 58.855 | 0.961 | 0.328 | 0.579 |
| OCorpus Callosumipital Lateral (L) | 2361.404 ± 558.149 | 2514.421 ± 648.186 | 0.736 | 0.392 | 0.605 |
| OCorpus Callosumipital Lateral (R) | 2930.355 ± 669.229 | 2919.887 ± 543.78 | 0.345 | 0.558 | 0.688 |

Note: Data are shown as mean ± SD. Abbreviations: AS = Asphyxia, L = left, R = right, SD = Standard Deviation.

**Supplementary Materials 4.** Regional Cortical Curvature: AS Group vs. non-AS Group

| Curvature | AS group | non-AS group | F | *p* value | Corrected *p-value* |
| --- | --- | --- | --- | --- | --- |
| Precentral (L) | 0.275 ± 0.038 | 0.290 ± 0.045 | 4.498 | **0.035** | 0.355 |
| Precentral (R) | 0.288 ± 0.058 | 0.297 ± 0.044 | 1.805 | 0.181 | 0.595 |
| Postcentral (L) | 0.259 ± 0.042 | 0.263 ± 0.047 | 0.565 | 0.453 | 0.782 |
| Postcentral (R) | 0.248 ± 0.050 | 0.244 ± 0.043 | 0.046 | 0.831 | 0.912 |
| Paracentral (L) | 0.339 ± 0.066 | 0.334 ± 0.058 | 0.039 | 0.845 | 0.912 |
| Paracentral (R) | 0.379 ± 0.075 | 0.382 ± 0.057 | 0.266 | 0.607 | 0.782 |
| Frontal Superior (L) | 0.305 ± 0.061 | 0.304 ± 0.038 | 0.000 | 0.993 | 0.993 |
| Frontal Superior (R) | 0.298 ± 0.059 | 0.301 ± 0.043 | 0.198 | 0.657 | 0.782 |
| Frontal Middle Rostral (L) | 0.302 ± 0.036 | 0.317 ± 0.040 | 4.925 | **0.028** | 0.279 |
| Frontal Middle Rostral (R) | 0.325 ± 0.046 | 0.338 ± 0.045 | 2.477 | 0.117 | 0.509 |
| Frontal Middle Caudal (L) | 0.327 ± 0.081 | 0.339± 0.074 | 1.196 | **0.005** | 0.046 |
| Frontal Middle Caudal (R) | 0.295 ± 0.078 | 0.315 ± 0.080 | 2.521 | 0.114 | 0.509 |
| Frontalpole (L) | 0.196 ± 0.075 | 0.191 ± 0.047 | 0.296 | 0.587 | 0.782 |
| Frontalpole (R) | 0.215 ± 0.078 | 0.213 ± 0.056 | 0.047 | 0.828 | 0.912 |
| Orbitofrontal Lateral (L) | 0.338 ± 0.053 | 0.344 ± 0.046 | 0.539 | 0.464 | 0.782 |
| Orbitofrontal Lateral (R) | 0.331 ± 0.059 | 0.343 ± 0.053 | 1.202 | 0.275 | 0.595 |
| Orbitofrontal Medial (L) | 0.302 ± 0.069 | 0.291 ± 0.043 | 1.063 | 0.304 | 0.595 |
| Orbitofrontal Medial (R) | 0.323 ± 0.064 | 0.326 ± 0.040 | 0.385 | 0.536 | 0.782 |
| Parsopercularis (L) | 0.312 ± 0.062 | 0.328 ± 0.070 | 2.485 | 0.117 | 0.509 |
| Parsopercularis (R) | 0.313 ± 0.082 | 0.313 ± 0.062 | 0.030 | 0.863 | 0.912 |
| Parsorbitalis (L) | 0.258 ± 0.065 | 0.242 ± 0.065 | 1.623 | 0.204 | 0.595 |
| Parsorbitalis (R) | 0.225 ± 0.078 | 0.259 ± 0.073 | 5.595 | **0.019** | 0.192 |
| Parstriangularis (L) | 0.327 ± 0.082 | 0.365 ± 0.068 | 1.460 | **<0.001** | 0.003 |
| Parstriangularis (R) | 0.277 ± 0.055 | 0.304 ± 0.062 | 5.784 | **0.017** | 0.173 |
| Insula (L) | 0.359 ± 0.049 | 0.383 ± 0.062 | 6.410 | **0.012** | 0.123 |
| Insula (R) | 0.357 ± 0.096 | 0.384 ± 0.064 | 5.318 | **0.022** | 0.224 |
| Cingulum Anterior (L) | 0.433 ± 0.121 | 0.464 ± 0.111 | 3.392 | 0.067 | 0.478 |
| Cingulum Anterior (R) | 0.442 ± 0.104 | 0.453 ± 0.105 | 0.663 | 0.417 | 0.729 |
| Cingulum Middle (L) | 0.409 ± 0.145 | 0.421 ± 0.106 | 0.678 | 0.411 | 0.729 |
| Cingulum Middle (R) | 0.350 ± 0.082 | 0.367 ± 0.099 | 1.574 | 0.211 | 0.595 |
| Cingulum Post (L) | 0.368 ± 0.074 | 0.375 ± 0.076 | 0.829 | 0.364 | 0.729 |
| Cingulum Post (R) | 0.316 ± 0.069 | 0.337 ± 0.070 | 4.011 | **0.047** | 0.469 |
| IsthmuscinguLaterale (L) | 0.332 ± 0.068 | 0.336 ± 0.069 | 0.495 | 0.483 | 0.782 |
| IsthmuscinguLaterale (R) | 0.283 ± 0.053 | 0.288 ± 0.062 | 0.485 | 0.487 | 0.782 |
| Parahippocampal (L) | 0.281 ± 0.107 | 0.268 ± 0.097 | 0.348 | 0.556 | 0.782 |
| Parahippocampal (R) | 0.258 ± 0.066 | 0.279 ± 0.086 | 2.215 | 0.139 | 0.509 |
| Parietal Superior (L) | 0.351 ± 0.037 | 0.358 ± 0.044 | 1.763 | 0.186 | 0.595 |
| Parietal Superior (R) | 0.366 ± 0.043 | 0.370 ± 0.047 | 0.658 | 0.418 | 0.729 |
| Parietal Inferio (L) | 0.334 ± 0.050 | 0.339 ± 0.045 | 0.574 | 0.450 | 0.782 |
| Parietal Inferio (R) | 0.336 ± 0.046 | 0.341 ± 0.047 | 0.642 | 0.424 | 0.729 |
| Cuneus (L) | 0.348 ± 0.047 | 0.345 ± 0.066 | 0.011 | 0.915 | 0.993 |
| Cuneus (R) | 0.288 ± 0.060 | 0.288 ± 0.071 | 0.029 | 0.866 | 0.912 |
| Entorhinal (L) | 0.229 ± 0.085 | 0.245 ± 0.064 | 1.890 | 0.171 | 0.595 |
| Entorhinal (R) | 0.224 ± 0.073 | 0.233 ± 0.094 | 0.300 | 0.585 | 0.782 |
| Fusiform (L) | 0.352 ± 0.050 | 0.374 ± 0.051 | 6.459 | **0.012** | 0.120 |
| Fusiform (R) | 0.419 ± 0.052 | 0.422 ± 0.061 | 0.267 | 0.606 | 0.782 |
| Lingual (L) | 0.341 ± 0.046 | 0.353 ± 0.045 | 2.845 | 0.094 | 0.469 |
| Lingual (R) | 0.353 ± 0.043 | 0.362 ± 0.049 | 1.606 | 0.207 | 0.595 |
| Pericalcarine (L) | 0.439 ± 0.072 | 0.441 ± 0.080 | 0.184 | 0.668 | 0.782 |
| Pericalcarine (R) | 0.391 ± 0.056 | 0.390 ± 0.072 | 0.007 | 0.935 | 0.993 |
| Precuneus (L) | 0.388 ± 0.044 | 0.387 ± 0.043 | 0.009 | 0.927 | 0.993 |
| Precuneus (R) | 0.384 ± 0.048 | 0.387 ± 0.042 | 0.259 | 0.611 | 0.782 |
| Superiorramarginal (L) | 0.300 ± 0.056 | 0.310 ± 0.063 | 0.775 | **0.003** | 0.031 |
| Superiorramarginal (R) | 0.339 ± 0.061 | 0.341 ± 0.050 | 0.149 | 0.700 | 0.782 |
| Temporal Superior (L) | 0.285 ± 0.056 | 0.289 ± 0.056 | 0.701 | 0.404 | 0.729 |
| Temporal Superior (R) | 0.226 ± 0.073 | 0.226 ± 0.058 | 0.055 | 0.814 | 0.912 |
| Temporal Middle (L) | 0.247 ± 0.040 | 0.261 ± 0.048 | 3.134 | 0.079 | 0.469 |
| Temporal Middle (R) | 0.261 ± 0.048 | 0.274 ± 0.046 | 2.903 | 0.090 | 0.469 |
| Temporal Inferio (L) | 0.285 ± 0.057 | 0.286 ± 0.050 | 0.031 | 0.860 | 0.912 |
| Temporal Inferio (R) | 0.305 ± 0.087 | 0.336± 0.054 | 2.596 | **0.004** | 0.037 |
| Temporalpole (L) | 0.186 ± 0.126 | 0.180 ± 0.058 | 0.098 | 0.755 | 0.782 |
| Temporalpole (R) | 0.193 ± 0.153 | 0.196 ± 0.066 | 0.074 | 0.785 | 0.782 |
| Temporal Superior Banks (L) | 0.373 ± 0.085 | 0.368 ± 0.080 | 0.013 | 0.910 | 0.993 |
| Temporal Superior Banks (R) | 0.376 ± 0.128 | 0.384 ± 0.105 | 0.180 | 0.672 | 0.782 |
| Transverse temporal (L) | 0.228 ± 0.097 | 0.222 ± 0.106 | 0.039 | 0.843 | 0.912 |
| Transverse temporal (R) | 0.261 ± 0.117 | 0.251 ± 0.101 | 0.137 | 0.712 | 0.782 |
| OCorpus Callosumipital Lateral (L) | 0.343 ± 0.052 | 0.351 ± 0.037 | 1.755 | 0.187 | 0.595 |
| OCorpus Callosumipital Lateral (R) | 0.357 ± 0.045 | 0.374 ± 0.043 | 6.657 | **0.011** | 0.108 |

Note: Data are shown as mean ± SD. Abbreviations: AS = Asphyxia, L = left, R = right, SD = Standard Deviation.
